# Supplementary material for: Deciphering the role of van der Waals heterostructures in enhancing layered perovskite anodes for high-performance lithium-ion batteries
Source: Royal Society of Chemistry journal article supplement (doi:10.1039/d4ta09133g), 2025-01-01
Supplement: d4ta09133g1.pdf [file d4ta09133g1.pdf]

## *Supporting information*

### Deciphering the role of Van der Waals heterostructures in enhancing layered perovskite anodes for high-performance lithium-ion batteries

Xiao-Hui Wu<sup>1, #</sup>, Yun Chai<sup>1, #</sup>, Jie Shen<sup>3</sup>, Pei-Wen Huang<sup>1</sup>, Si-Yu Xu<sup>1</sup>, Hou-Yang Zhong<sup>1</sup>, Bi-Cui Chen<sup>1</sup>, Yi Zhao<sup>2, \*</sup>, Baisheng Sa<sup>3, \*</sup>, and Ke-Zhao Du<sup>1, \*</sup>

<sup>1</sup>College of Chemistry and Materials Science, Fujian Provincial Key Laboratory of Advanced Materials Oriented Chemical Engineering, Fujian Normal University, Fuzhou, 350117, China

<sup>2</sup>Strait Institute of Flexible Electronics (SIFE Future Technologies), Fujian Key Laboratory of Flexible Electronics, Fujian Normal University and Strait Laboratory of Flexible Electronics (SLoFE), Fuzhou 350117, China

<sup>3</sup>Multiscale Computational Materials Facility & Materials Genome Institute, School of Materials Science and Engineering, Fuzhou University, Fuzhou 350100, China

# These authors contributed equally to this work.

\*Corresponding author

E-mail: duke@fjnu.edu.cn; ifeyzhao@fjnu.edu.cn; bssa@fzu.edu.cn

## **Materials Synthesis**

### **Synthesis of $\text{Li}_2(\text{taurine})_2\text{CuCl}_4$ (LTCC)**

Taurine (99%, Macklin), Copper (II) chloride, anhydrous ( $\text{CuCl}_2$ , 97%, Acros), Lithium chloride, anhydrous ( $\text{LiCl}$ , 99%, Adamas). All chemicals were directly used without further purification. For the fabrication of LTCC, taurine (75 mg, 0.60 mmol) and anhydrous  $\text{CuCl}_2$  (0.30 mmol) were added to a 10 M  $\text{LiCl}$  aqueous solution (0.3 ml) in a 4 mL vial. The mixture was heated to 100 °C and stirred until the precursors were completely dissolved. Then, the vial was left to cool for 2–3 h and square yellow plate-like crystals precipitated.

### **Materials Characterization**

The crystalline phase of as-prepared samples was characterized using a powder X-ray diffractometer (PXRD, Bruker D8 Advance) with  $\text{Cu K}\alpha$  radiation ( $\lambda = 1.5418 \text{ \AA}$ ). The structure and composition of as-prepared samples were characterized by scanning electron microscopy (SEM, Hitachi SU8100) equipped with energy dispersive X-ray spectroscopy (EDS) and transmission electron microscopy (TEM, JEM F200). The chemical compositions and the bonding structures were determined by X-ray photoelectron spectroscopy (XPS, Thermo ESCALAB 250XI).

### **Electrochemical Measurements**

The electrochemical properties were measured using coin cells (CR2032), where 1 M  $\text{LiPF}_6$  solution in a mixture of ethylene carbonate, diethyl carbonate, and dimethyl carbonate (1:1:1 in volume) with 5.0 wt.% weight ratio fluoroethylene carbonate was used as the electrolyte, Celgard 2300 microporous membrane was used as separators, and lithium foil was used as the counter electrodes. The active materials, Ketjen black and polyvinylidene difluoride with a

weight ratio of 8: 1: 1, were mixed in N-methyl pyrrolidone. The slurry was placed onto copper foil to prepare the working electrode and dried at 80 °C for 12 h. The active material loading on the electrode (diameter was 12 mm) was 1-1.2 mg cm<sup>-2</sup>. To assemble the CR2032-type coin cells, the argon atmosphere glove box (Mikrouna) was used, where both H<sub>2</sub>O and O<sub>2</sub> were kept below 0.01 ppm. The galvanostatic charge/discharge tests in the voltage range of 0.005-3.0 V (vs. Li/Li<sup>+</sup>) were performed with a LAND cyler test system at 30 °C. The cyclic voltammetry (CV) and electrochemical impedance spectroscopy (EIS, at the frequency range of 0.1 HZ to 100000 Hz) were measured on an electrochemical workstation (CHI660E, CH instrument).

### **Computational details**

All calculations were performed using the PWmat code<sup>[1,2]</sup> with the norm-conserving SG15 pseudopotential.<sup>[3,4]</sup> The exchange-correlation interactions were treated by the generalized gradient approximation in the form of the Perdew–Burke–Ernzerhof (PBE) functional.<sup>[5,6]</sup> All calculations were also performed by including the Grimme dispersion corrections (DFT-D3).<sup>[7,8]</sup> To avoid the interactions between periodic images, a vacuum region > 15 Å was set along the direction perpendicular to the layer surface. The atom-surface distance was optimized by relaxing the first three layers of the slab. The energy cutoff of the plane-wave was set to 60 Ryd (~816.34 eV), and the maximum force convergence tolerances were set to 0.02 eV·Å<sup>-1</sup>. A 2 × 2 × 1 k-point sampling was used based on the Monkhorst-Pack scheme.<sup>[9]</sup> The nudged elastic band (NEB) method was used to optimize the Li atom migration paths and to evaluate the energy barriers associated with Li-ion diffusion on the material surface.

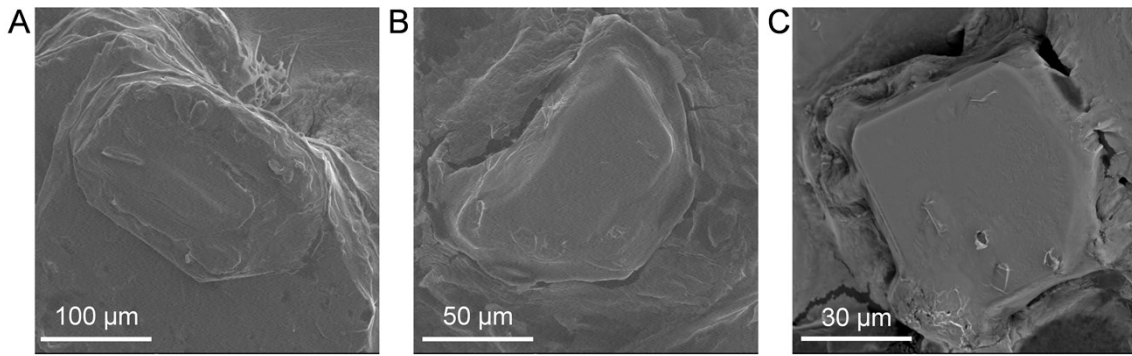

**Fig. S1** (A-C) SEM images of LTCC crystals.

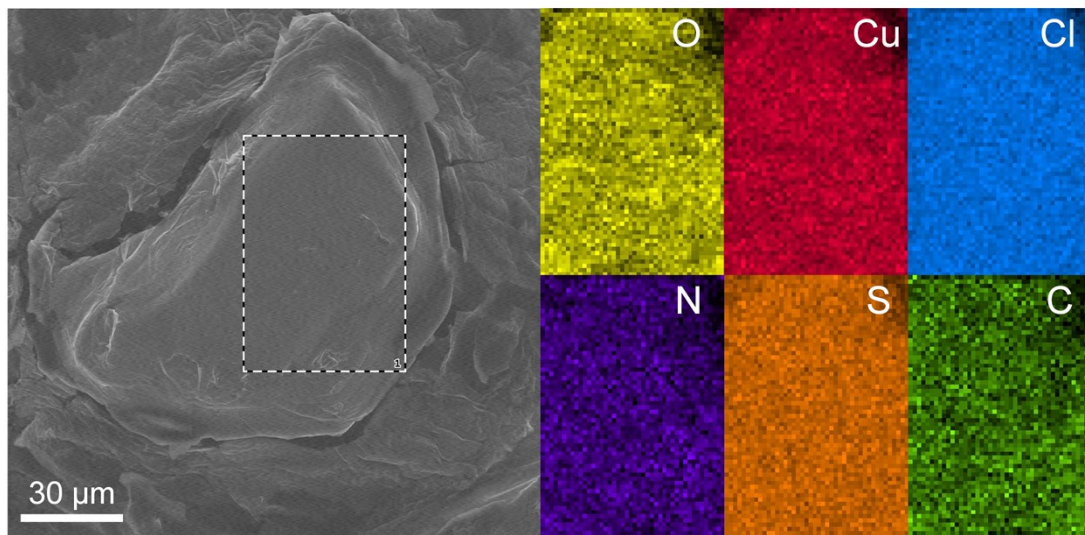

**Fig. S2** SEM image with the corresponding EDS images of LTCC sample.

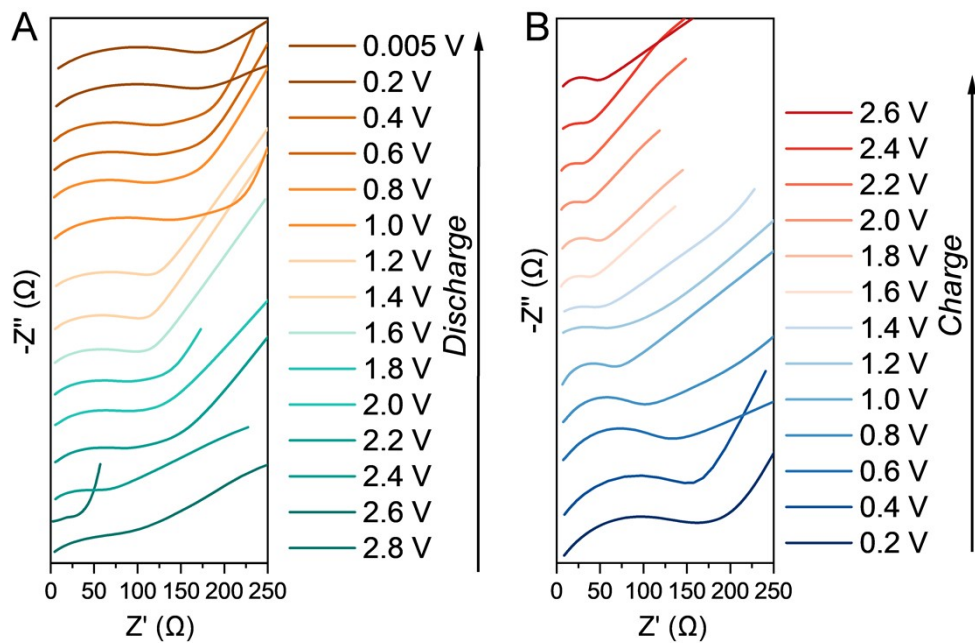

**Fig. S3** The EIS spectra of the LTCC electrode at (A) different discharging voltages and (B) different charging voltages.

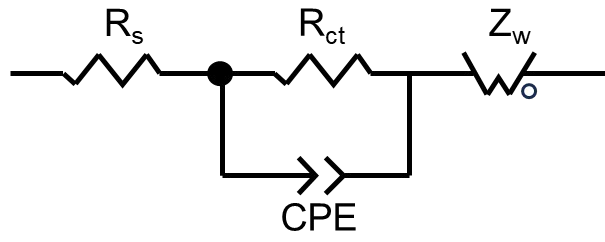

**Fig. S4** The fitting equivalent circuit for EIS spectra.

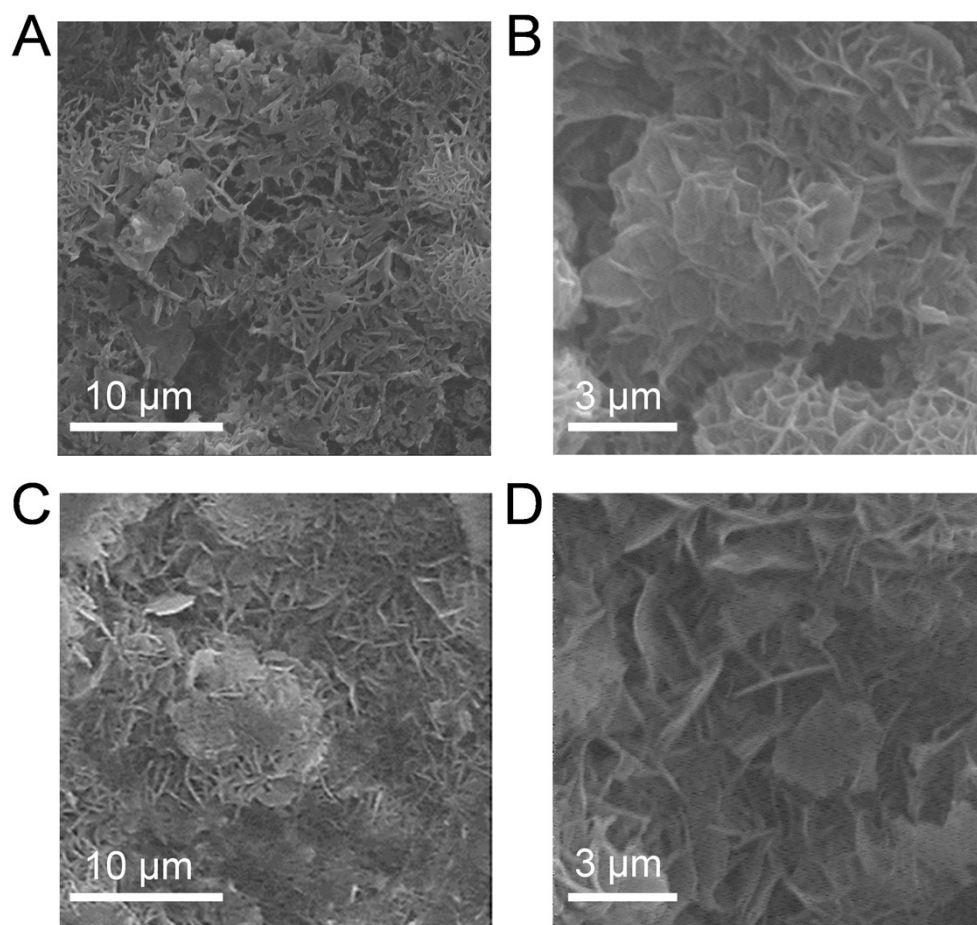

**Fig. S5** SEM images of the LTCC electrode after (A-B) initial fully discharged state and (C-D) fully charged state.



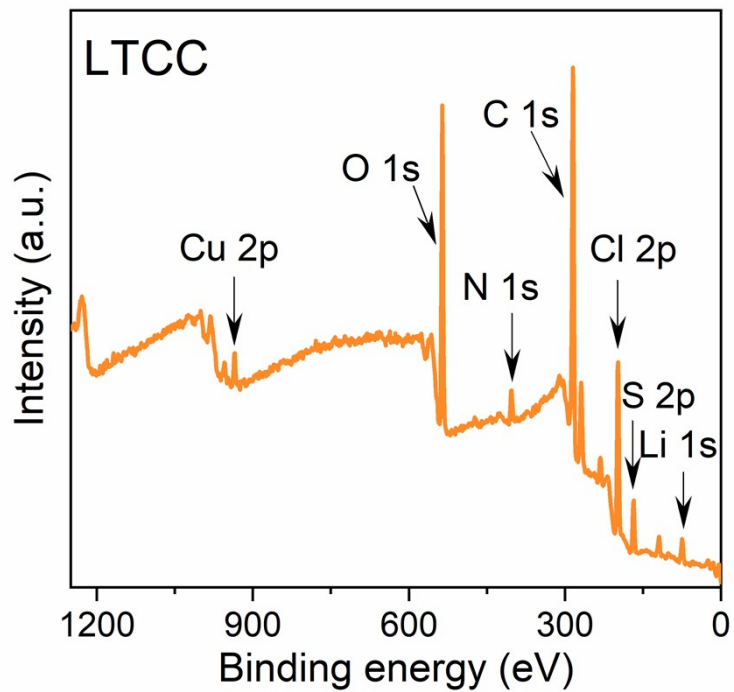

**Fig. S6** XPS full survey of the fresh LTCC sample.

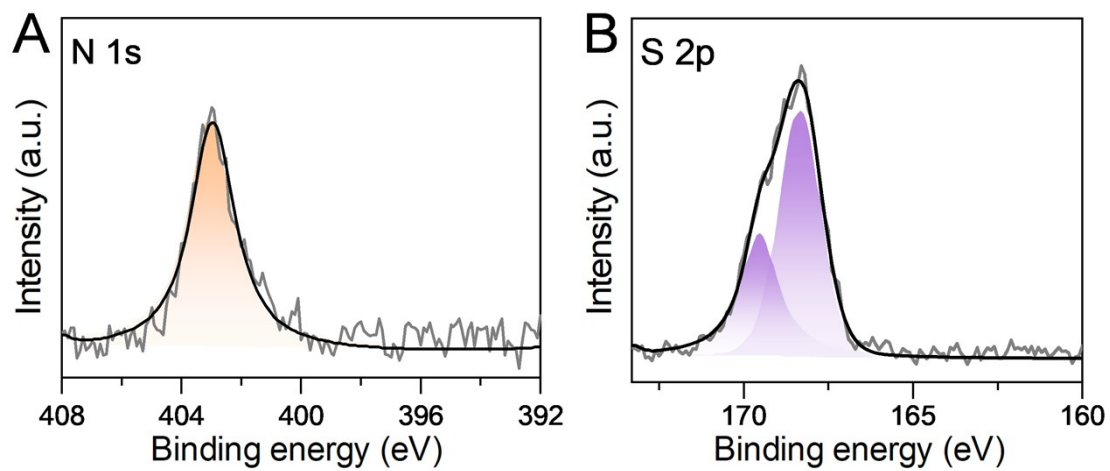

**Fig. S7** High-resolution (A) N 1s and (B) S 2p XPS spectra of fresh LTCC.

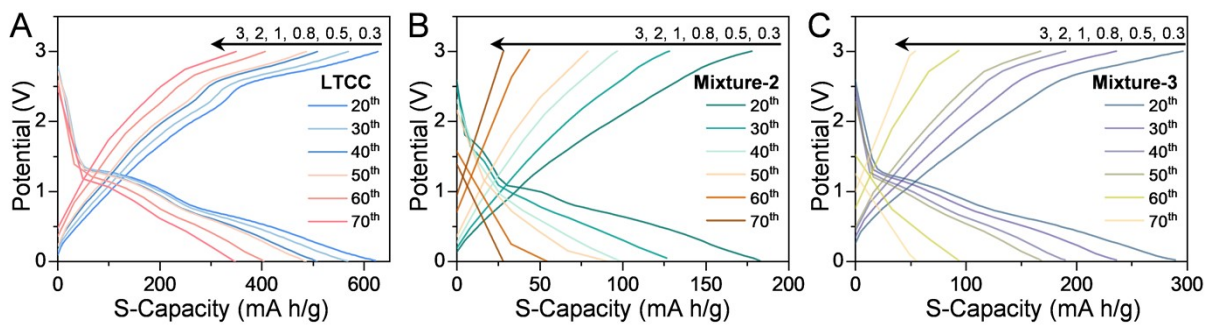

**Fig. S8** Typical discharge/charge profiles under various current densities of (A) LTCC, (B) Mixture-2, and (C) Mixture-3 electrodes.

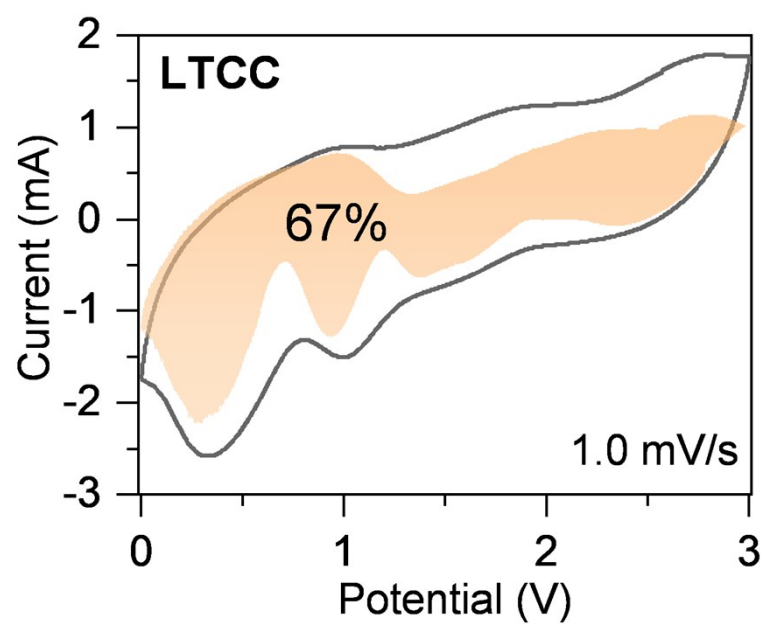

**Fig. S9** Capacitive contribution during the lithiation/delithiation processes of LTCC electrode at a scan rate of 1.0 mV/s.

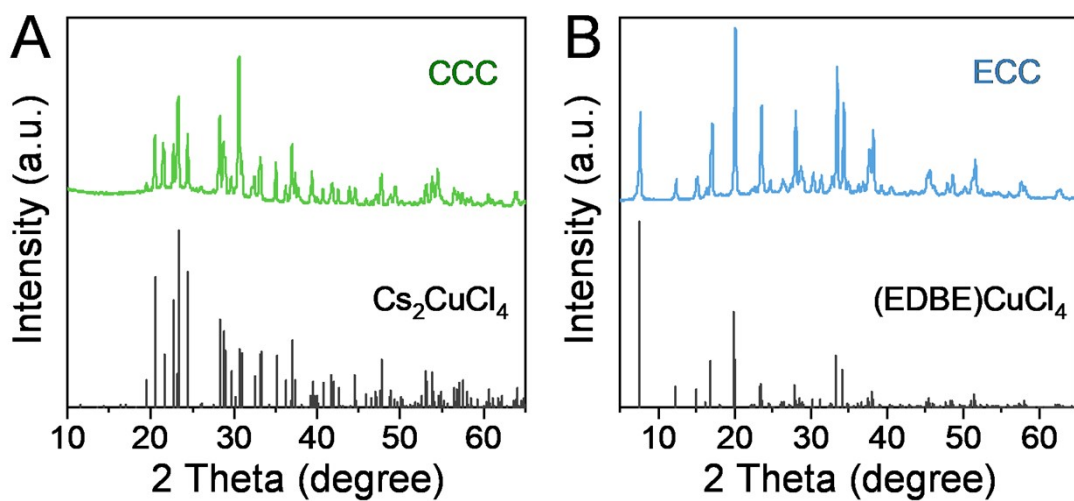

**Fig. S10.** The XRD patterns of the synthesized (A) CCC and (B) ECC crystals and the standard patterns of  $\text{Cs}_2\text{CuCl}_4$  and  $(\text{EDBE})\text{CuCl}_4$ .

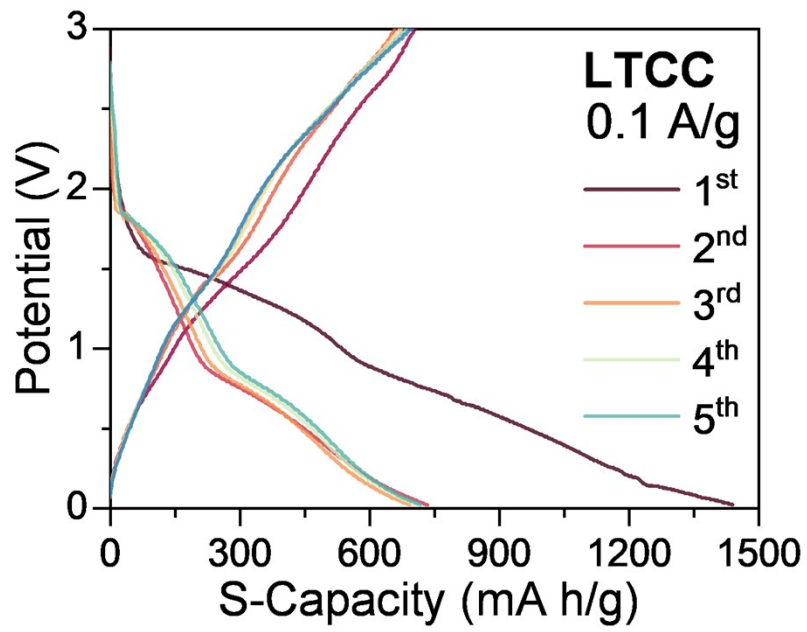

**Fig. S11** GDC profiles of the LTCC electrode for the first five cycles at 0.1 A/g.

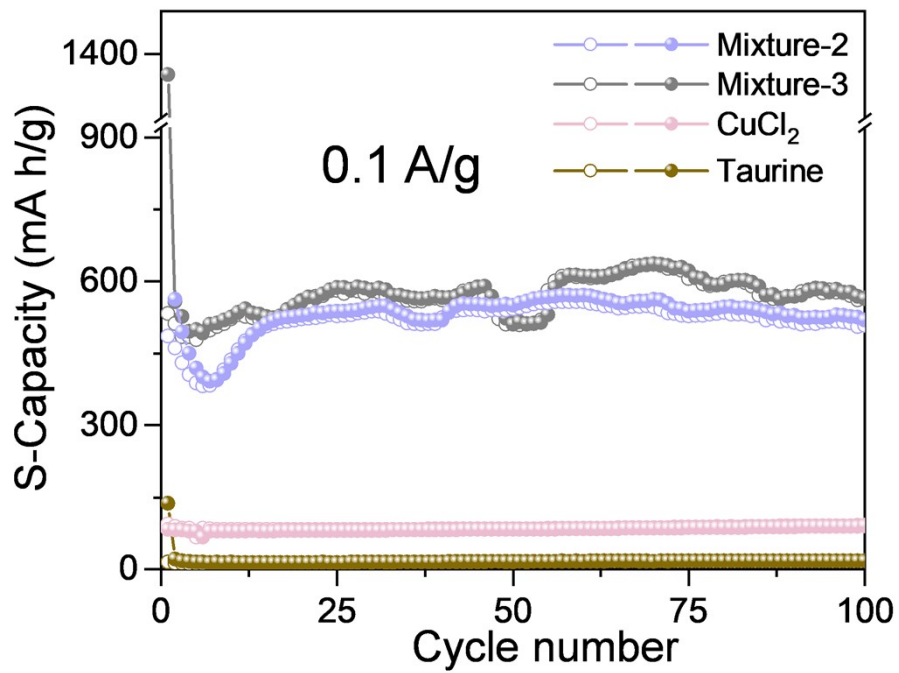

**Fig. S12** Cycling performance of CuCl<sub>2</sub>, Taurine, Mixture-2, and Mixture-3 electrodes at 0.1 A/g.

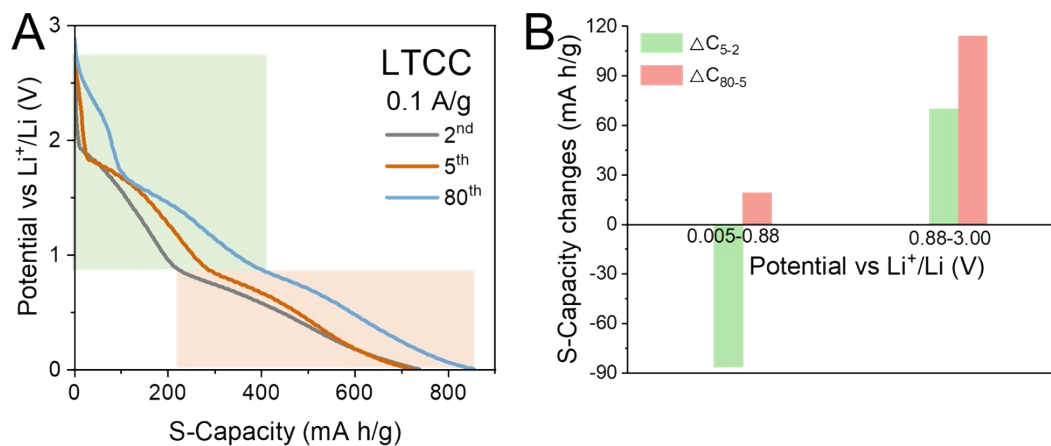

**Fig. S13** (A) Comparison of the charge-discharge profiles at 2<sup>nd</sup>, 5<sup>th</sup>, and 80<sup>th</sup> cycles. (G) The calculated specific capacity in two potential regions of LTCC electrode at specified cycle numbers under 0.1 A/g in the range of 0.005-3.0 V.



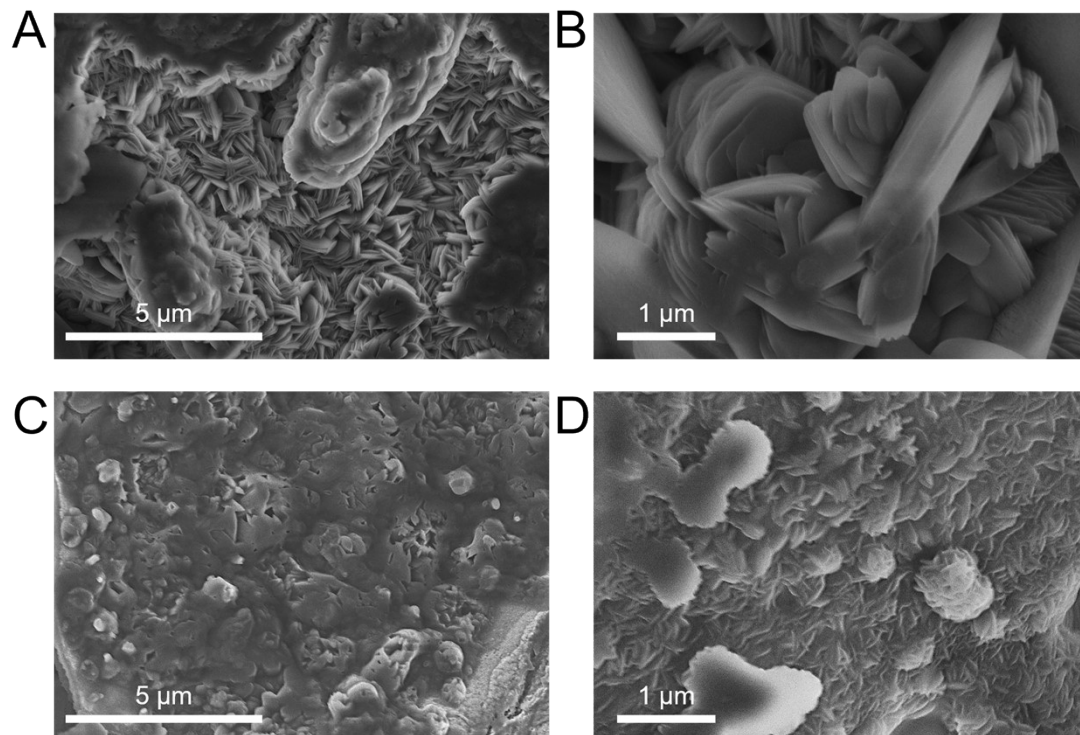

**Fig. S14** SEM images of LTCC electrode at (A-B) the 5<sup>th</sup> cycle and (C-D) the 80<sup>th</sup> cycle.

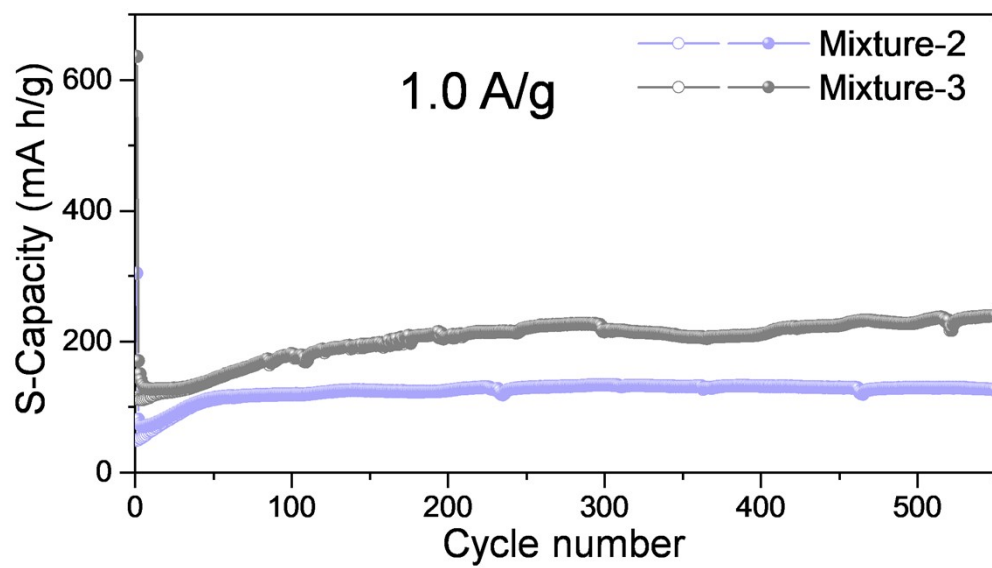

**Fig. S15** Cycling performance of Mixture-2 and Mixture-3 electrodes at 1.0 A/g.

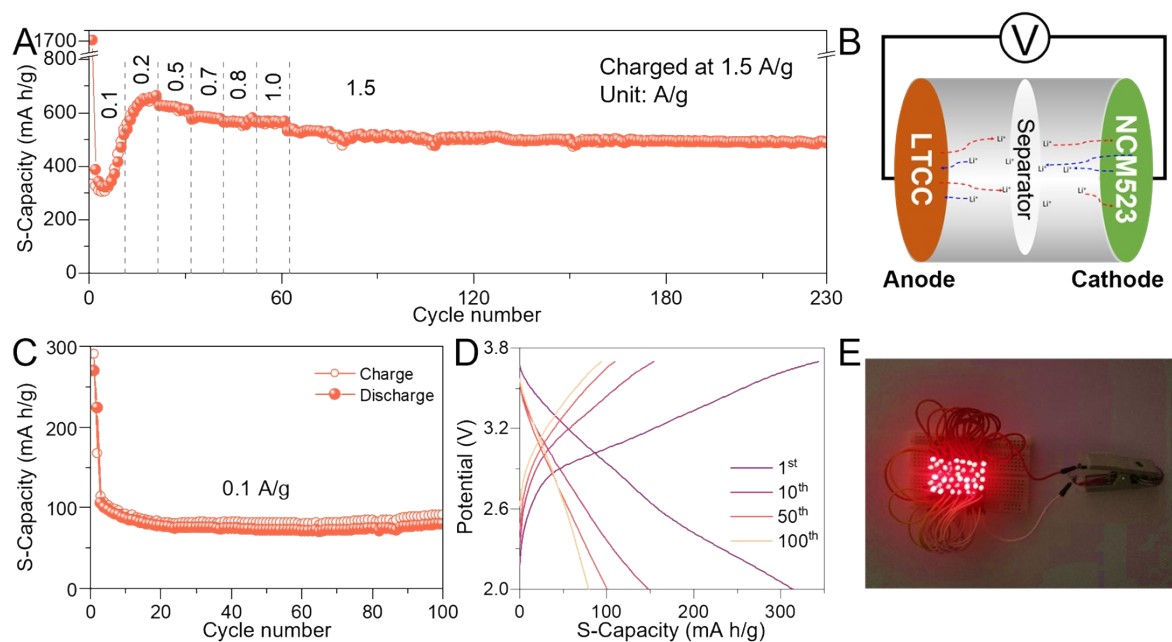

**Fig. S16** (A) The fast charging and slow discharging performance of LTCC electrode. (B) A full battery with NCM523 as cathode and LTCC as anode. (C) Cycling performance and (D) the charge-discharge curves of LTCC II NCM523 full cell at 0.1 A/g. (E) 40 bright LEDs illuminated by a single LTCC II NCM523 full cell.

**Table S1.** Comparison of cycle performance of reported perovskite material and LTCC anode materials (The capacity calculation is based on the whole composite).

| Materials                                                                                                                                | Cycling performance   |              |                            | Rate performance                                | References |
|------------------------------------------------------------------------------------------------------------------------------------------|-----------------------|--------------|----------------------------|-------------------------------------------------|------------|
|                                                                                                                                          | Current density (A/g) | Cycle Number | Specific capacity (mA h/g) |                                                 |            |
| LTCC                                                                                                                                     | 0.1                   | 100          | 870                        | 801, 490, and 380 mA h/g at 0.1, 1, and 3 A/g   | This work  |
| LTCC                                                                                                                                     | 1.0                   | 550          | 548                        | 390, 280, and 123 mA h/g at 0.1, 1, and 3 A/g   | This work  |
| Cs <sub>2</sub> CuBr <sub>4</sub> /3D                                                                                                    | 0.5                   | 200          | 415                        | 390, 280, and 123 mA h/g at 0.1, 1, and 3 A/g   | 10         |
| (EDBE)[CuCl <sub>4</sub> ]                                                                                                               | 0.028                 | 200          | 52                         | No data                                         | 11         |
| LiPCI                                                                                                                                    | 0.3                   | 400          | 121                        | 162, 114, and 117 mA h/g at 0.2, 0.5, and 1 A/g | 12         |
| 2D Cu-THQ MOF                                                                                                                            | 0.05                  | 100          | 340                        | 159 and 93 mA h/g at 0.5 and 1 A/g              | 13         |
| CeNb <sub>3</sub> O <sub>9</sub>                                                                                                         | 0.05                  | 200          | 195                        | 195 and 103 mA h/g at 0.125 and 5 A/g           | 14         |
| [(Bi,Na) <sub>1/5</sub> (La,Li) <sub>1/5</sub> (Ce,K) <sub>1/5</sub> Ca <sub>1/5</sub> Sr <sub>1/5</sub> ] <sub>2</sub> TiO <sub>3</sub> | 1.0                   | 300          | 120.4                      | 87.4, 62, and 59.5 mA h/g at 0.1, 1, and 3 A/g  | 15         |
| HoFeO <sub>3</sub>                                                                                                                       | 0.1                   | 120          | 437                        | 448, 408, and 365 mA h/g at 0.1, 1, and 3 A/g   | 16         |
| [C <sub>2</sub> H <sub>4</sub> N <sub>3</sub> S][BiI <sub>4</sub> ]                                                                      | 0.1                   | 250          | 530                        | 700, 240, and 200 mA h/g at 0.1, 1, and 2 A/g   | 17         |

## Reference:

- [1] Jia W, Fu J, Cao Z, et al., *Journal of Computational Physics*, 2013, 251: 102-115.
- [2] Jia W, Cao Z, Wang L, et al., *Computer Physics Communications*, 2013, 184(1): 9-18.
- [3] Schlipf M, Gygi F., *Computer Physics Communications*, 2015, 196: 36-44.
- [4] D. R. Hamann, *Physical Review B*, 2013, 88: 085117.
- [5] Perdew J P, Burke K, Ernzerhof M., *Physical Review Letters*, 1996, 77(18): 3865-3868.
- [6] Perdew J P, Ernzerhof M, Burke K., *The Journal of Chemical Physics*, 1996, 105(22): 9982-9985.
- [7] Grimme S, Antony J, Ehrlich S, et al., *The Journal of Chemical Physics*, 2010, 132(15): 154104.
- [8] Grimme S, *Journal of Computational Chemistry*, 2006, 27(15): 1787-1799.
- [9] Monkhorst H J, Pack J D., *Physical Review B*, 1976, 13(12): 5188-5192.
- [10] Pandey, P.; Sharma, N.; Panchal, R. A.; Gosavi, S.; Ogale, S., *ChemSusChem* 2019, 12, 3742-3746.
- [11] Jaffe, A.; Karunadasa, H. I., *Inorganic Chemistry* 2014, 53, 6494-6496.
- [12] Lin, L.; Liang, F.; Zhang, K.; Mao, H.; Yang, J.; Qian, Y., *Journal of Materials Chemistry A* 2018, 6, 15859-15867.
- [13] Jiang, Q.; Xiong, P.; Liu, J.; Xie, Z.; Wang, Q.; Yang, X. Q.; Hu, E.; Cao, Y.; Sun, J.; Xu, Y., *Angewandte Chemie International Edition* 2020, 59, 5273-5277.
- [14] Yang, L.; Xiong, X.; Liang, G.; Li, X.; Wang, C.; You, W.; Zhao, X.; Liu, X.; Che, R., *Advanced Materials* 2022, 34, 2200914.
- [15] Yan, J.; Wang, D.; Zhang, X.; Li, J.; Du, Q.; Liu, X.; Zhang, J.; Qi, X., *Journal of Materials Science* 2020, 55, 6942-6951.
- [16] Nguyen, A. T.; Phung, V. D.; Mittova, V. O.; Ngo, H. D.; Vo, T. N.; Le Thi, M. L.; Mittova, I. Y.; Le, M. L. P.; Ahn, Y. N.; Kim, I. T., *Scripta Materialia* 2022, 207, 114259.
- [17] Roy, K.; Li, T.; Ogale, S.; Robertson, N., *Journal of Materials Chemistry A* 2021, 9, 2689-2693.
